# Supplementary material for: Parathyroid Hormone Induces Human Valvular Endothelial Cells Dysfunction That Impacts the Osteogenic Phenotype of Valvular Interstitial Cells
Source: MDPI journal article supplement (doi:10.3390/ijms23073776), 2022-03-29
Supplement: s1 [file s1]

## Supplementary methods

### Glucose quantification assay

Glucose levels in the condition media from VEC exposed to PTH for 48h or 7 days were quantified using Glucose, GOD-PAP kit (DIALAB), according to manufacturer instructions.

### Supplementary figures

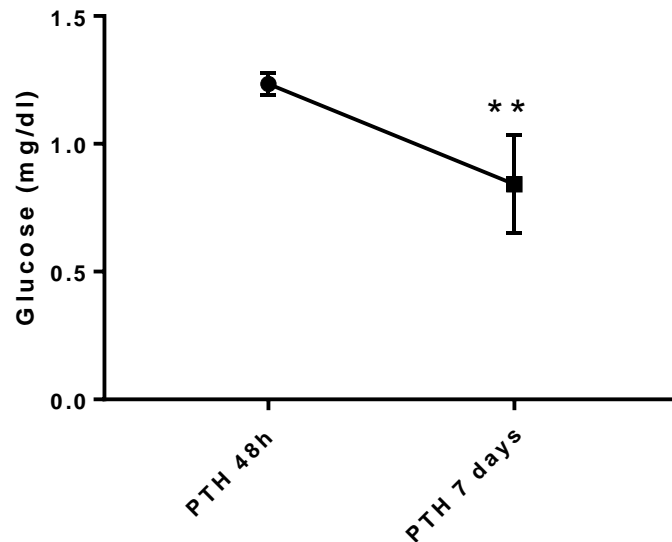

**Supplementary figure S1.** Evaluation of glucose levels in conditioned media from VEC exposed to PTH for 48h or 7 days. Conditioned media was analyzed for glucose levels using a glucose detection kit, \*\* $p < 0.01$ .

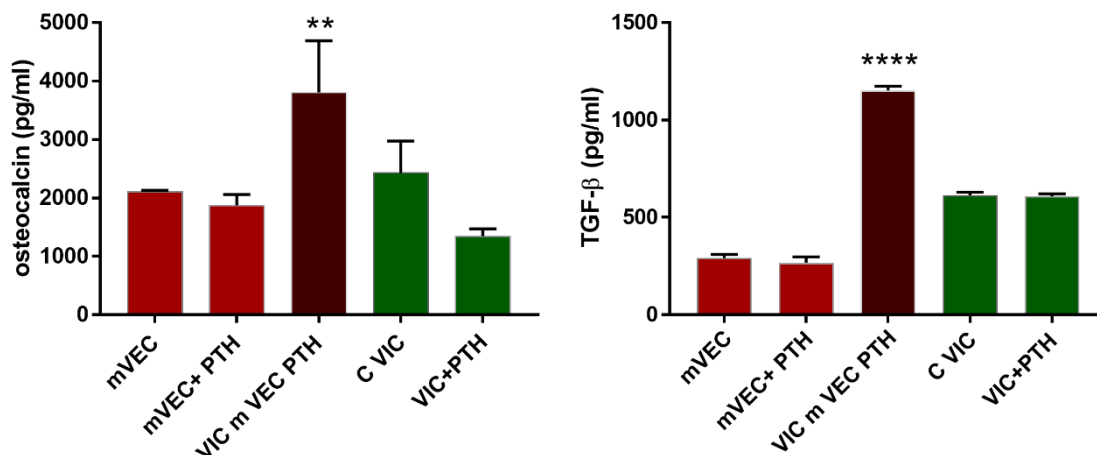

**Supplementary figure S2.** Osteocalcin and TGF- $\beta$  levels released by VEC or VIC in different experimental conditions: **mVEC** – CM from control VEC, **mVEC+PTH** - CM from VEC exposed to PTH, **VIC mVEC+PTH** - VIC treated with conditioned media from VEC exposed to PTH, **C VIC** - CM from control VIC, **VIC+PTH** – CM from VIC exposed to PTH, measured by ELISA. Note that CM from VEC or VEC+PTH or VIC exposed directly to PTH does not exhibit increased levels of osteocalcin or TGF- $\beta$ .  $n = 3$ , \*\* $p < .01$ , \*\*\*\* $p < .0001$ .

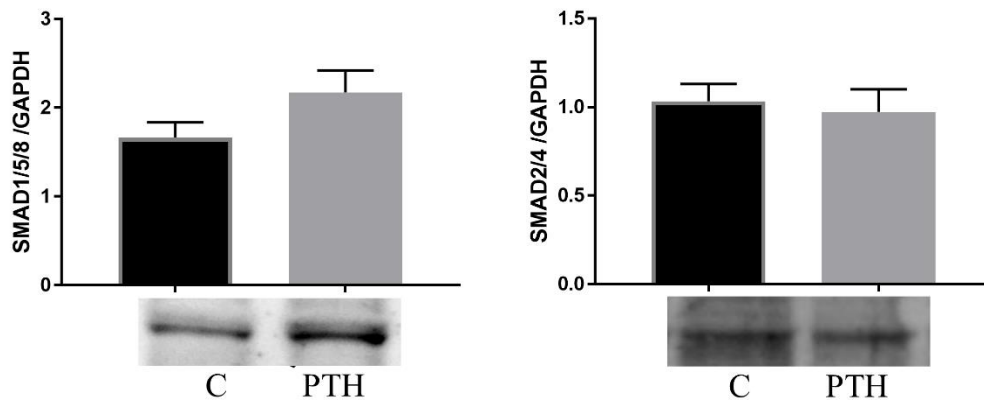

**Supplementary figure S3.** Protein expression of SMADs expressed by VEC exposed to PTH. Quantification of protein expression of SMAD1/5/8 and SMAD2/4 in VEC as determined by Western blot. (F) Representative Western Blot images for investigated molecules are presented.

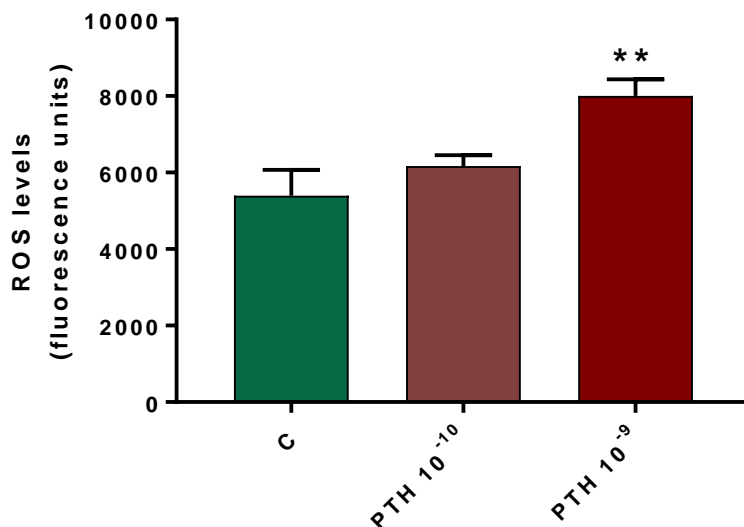

**Supplementary figure S4.** Evaluation of ROS production in response to two different concentrations of PTH. VEC were treated with PTH ( $10^{-10}$ M,  $10^{-9}$ M) and the total amount of ROS was determined incubating the cells with the fluorescent probe DCFDA. The ROS levels were expressed as relative fluorescence units (\*\* $p < 0.01$  vs. C). The image is the mean of three independent experiments.
